# Supplementary material
Source: publisher site journal article supplement (https://www.dovepress.com/article/392564)
Supplement: Supplementary file 1 [file get_supplementary_file.php]

**Questionnaire**

**1. Socio-demographic profile**

1.1. Kebele/sub-city_____________ 2. Age_____ 3. Sex: male female

4. Religion: A. Orthodox Christianity B. Islam C. Protestantism D. catholic E. Other, specify________

5. Marital status A. single B. married C. divorced

6. Level of education: A) Illiterate B primary school (1-8) C) secondary school (9-12) E) College/university

7. Ethnicity: A. Bench B. Amhara C. Kafa D. Tigre E. Oromo F. Other, (specify) ___________

8. Occupation: A. Government employee B . Non-government employee C. House wife

D. Retired E. other….

9. Family members ………….

10. Monthly income…………….

11. Do you have children below 5 years of age? A. yes B. no

12. Do you have adult elder 65 years of age? A. yes B. no

13. Do you have any health worker(s) in your family? A. yes B. no

14. Do you have any chronic patient(s) in your home? A. yes B. no

If yes specify the disease _______________

**2 Information on drug use**

1. Is there any family members of you get sick in the last 3 months?

A) Yes B) No

1. If yes what type(s) of disease condition is present in the family members?

A) Acute illness B) Chronic disease C) Both

1. If chronic disease which type(s) of chronic disease condition?

A) Hypertension B) Diabetes mellitus C) CVD D) Bronchial asthma E) Epilepsy

F) Other (specify)_______

1. Which types of medicine do you use in the home currently? If more than one specify.

A) OTC B) Prescribed C) Traditional medicine D) Other (specify)

1. If you use OTC or prescribed medicine from where you get?

A) Public pharmacy B) Private pharmacy C) Homemade D) Borrowed E) Other (specify)

1. From whom you get drug information?

A) Physician B) Pharmacist/Dispenser C) Traditional healer D) Social media

1. When your relatives get sick, do you recommend drugs to them?

A) Yes B) No

1. Do you stop taking the prescribed drugs when you feel better or symptom disappears?

A) Yes B) No

1. Knowledge about the drug

If you have knowledge about the drug thick the empty box below (more than one answer is possible)

A). Use of drug

B). Frequency of administration

C). Duration

D). Side effect

**3 Information on medicines storage in the households (currently used or left-over)**

1. Do you have any medicines available at home today?

A) Yes B) No

1. If yes where did you get the medicine?

A) Family, friend B) Public hospital C) Private pharmacy D) Others (specify)……...

1. Where do you store your medicine?

A) Bedroom B) Box C) On shelf D) Refrigerator E) Cupboard F. other place………

1. Which types medication store in the home?

A) Anti pain B) Antibiotic C) Anti diabetics drug D) Anti protozoa drug

E) CVS drugs F) Others (specify)……...

1. Why you need the medication to store in the home?

A) Current treatment B) Left from past treatment C) Anticipate future need

D) Others (specify)……...

1. How do you deal with leftover drugs?

A. Keep it future use by myself

B. Keep it for future use by others

C. Return it to pharmacy

D. Throw it

1. Situation of expiry date

A) Not expired B) Expired C) Not known

1. How do you deal with expired drugs

A) Used B) Kept but not used C) Disposed

1. Do you ever read medicines disposal instructions?

A) Yes B) No

1. How do you dispose expired drugs?

A) Throwing in waste B) Flushing in toilet

C) Returning to pharmacy D) Burying in backyard E. Another (specify)

1. Number of types of medicines per household?
2. One B. Two C. Three D. Four or more
3. Storage conditions of the medicines? A. Appropriately stored B. Inappropriately stored
4. Storage conditions of the inappropriately stored medicines?
5. Directly exposed to sunlight
6. Contaminated with dust
7. Within reach of children
8. Dosage form of the drugs
9. Tablet B. Capsule C. Semisolid D. Liquid (oral) E. Injections
10. Situation of the primary package
11. Intact (OK) B. Damaged (not OK)
12. Labeling A. Adequately labeled B. Not adequately labeled
